# Supplementary material for: N-Glycomics of Human Erythrocytes
Source: MDPI journal article supplement (doi:10.3390/ijms22158063), 2021-07-28
Supplement: s1 [file s1]

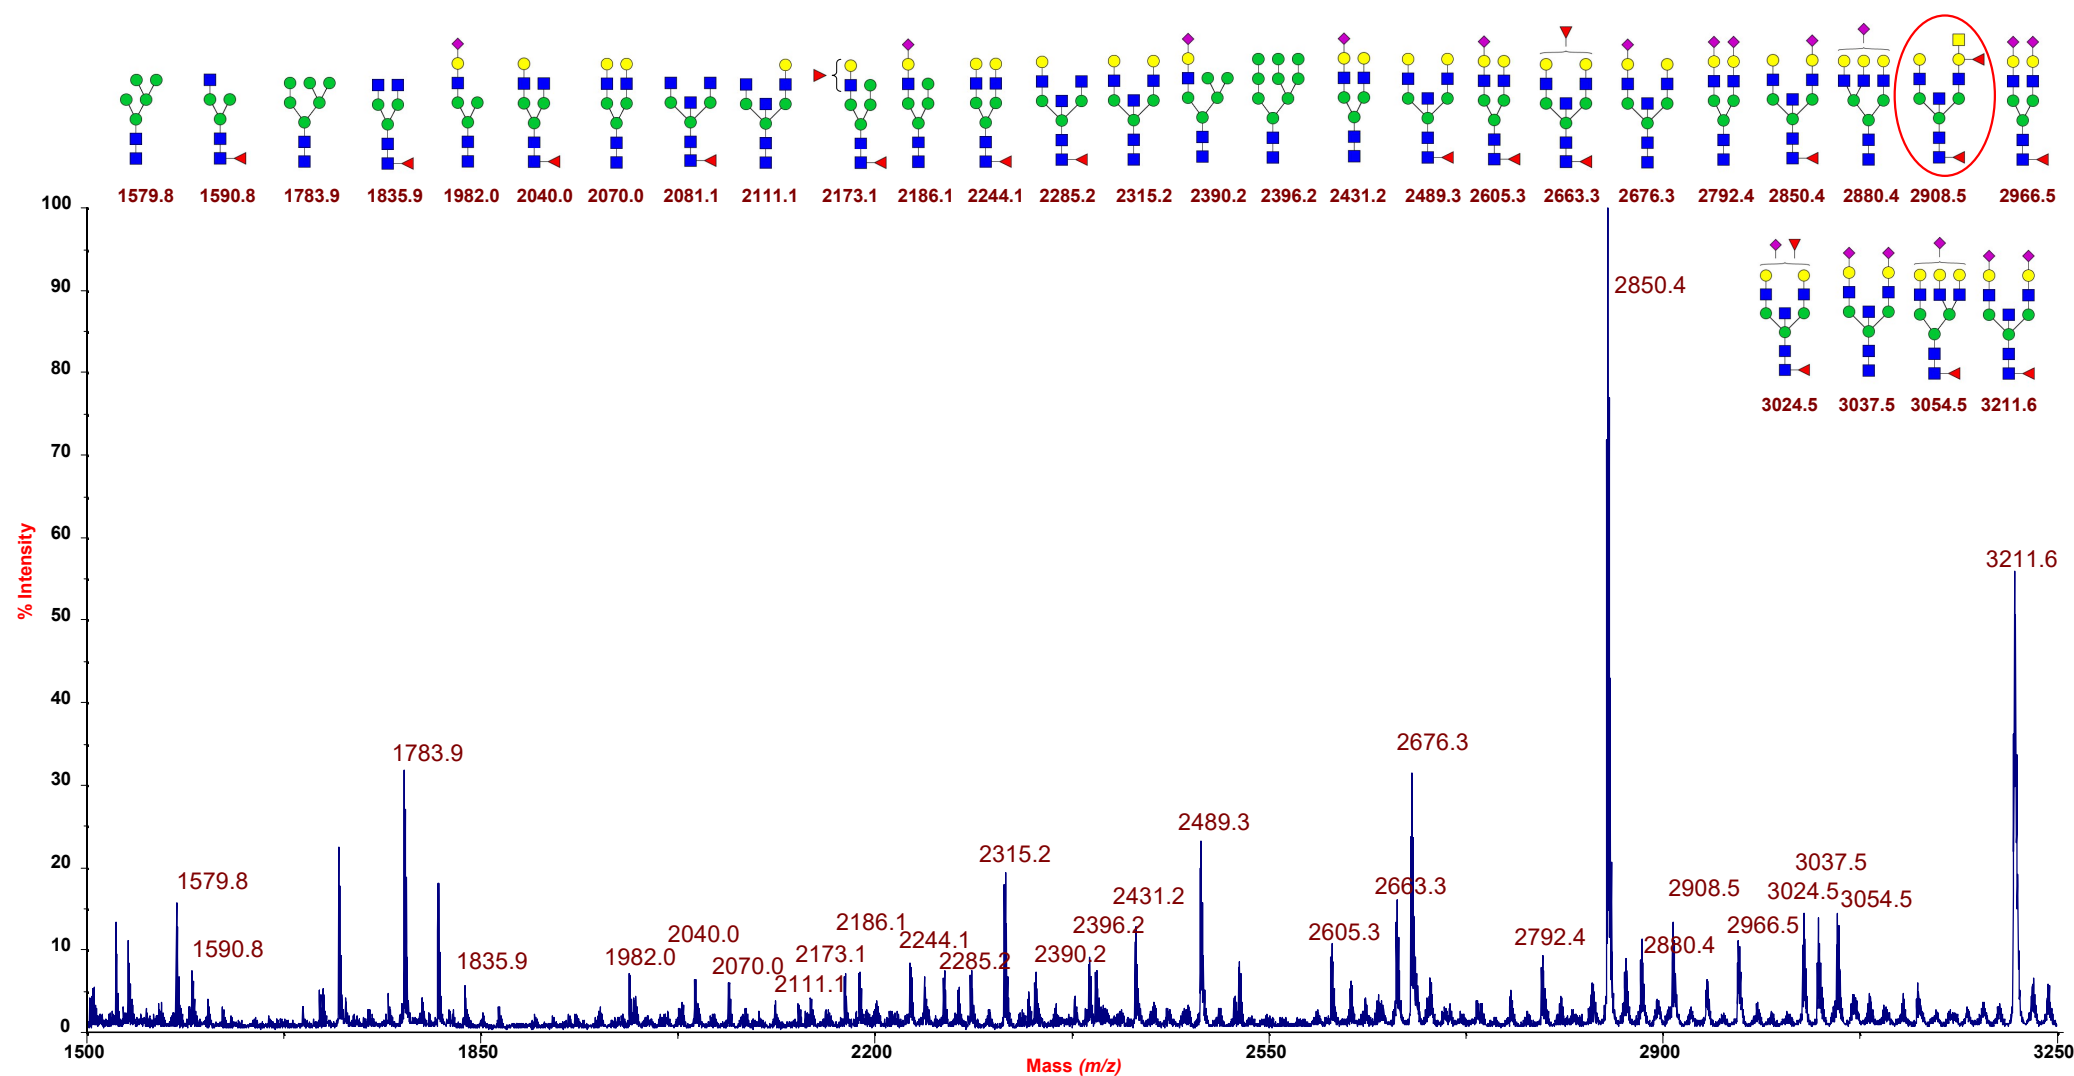

**Supplementary Figure 1. MALDI-TOF MS profile (low mass-range:  $m/z$  1500-3250) of permethylated human erythrocyte N-glycans from blood group A**  
 The present spectrum shows significant assignments, with those structures comprising the blood group A epitope highlighted with red circles.  
 GlcNAc: blue square; Man, green circle; Gal, yellow circle; NeuAc, purple lozenge; Fuc, red triangle.

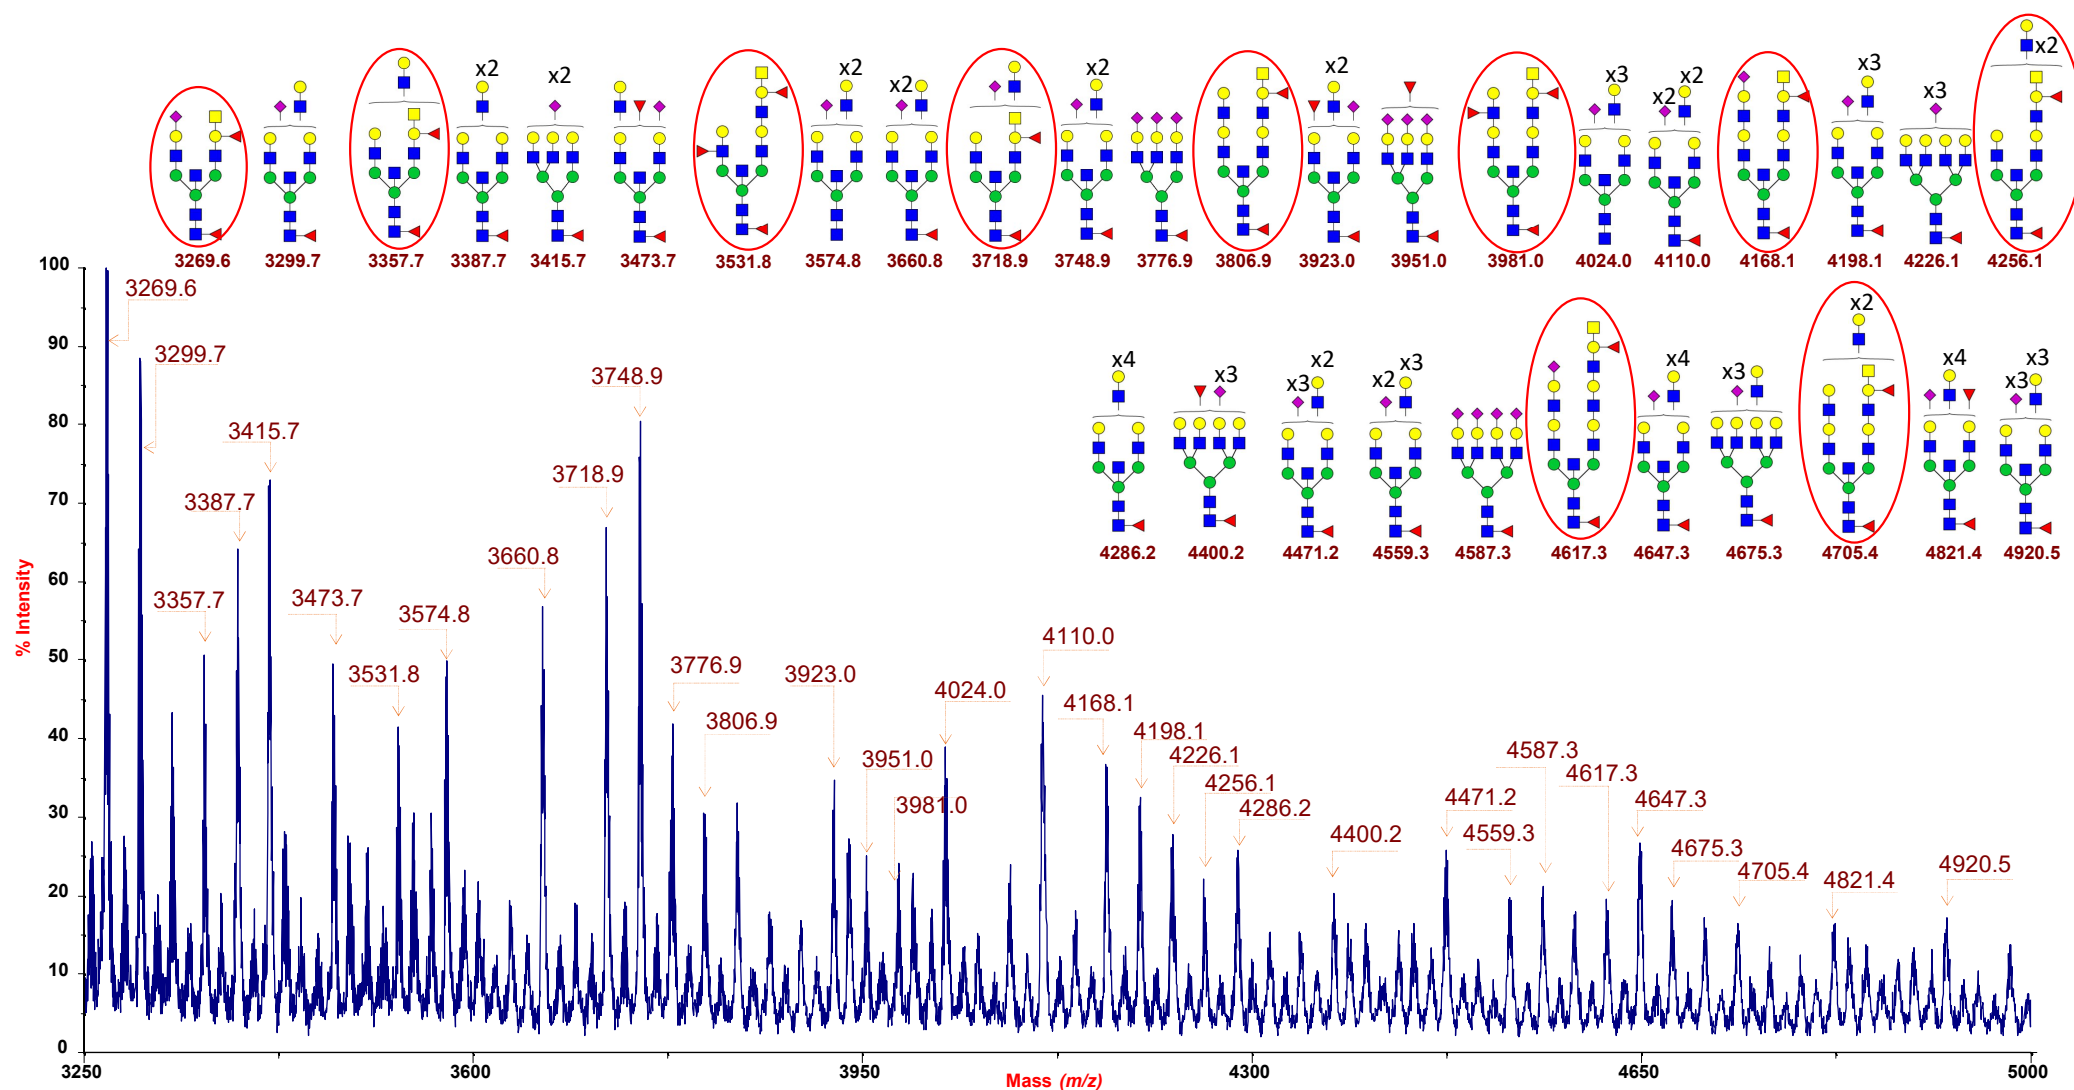

**Supplementary Figure 2. MALDI-TOF MS profile (middle mass-range:  $m/z$  3250-5000) of permethylated human erythrocyte N-glycans from blood group A**  
 The present spectrum shows significant assignments, with those structures comprising the blood group A epitope highlighted with red circles.  
 GlcNAc: blue square; Man, green circle; Gal, yellow circle; NeuAc, purple lozenge; Fuc, red triangle.

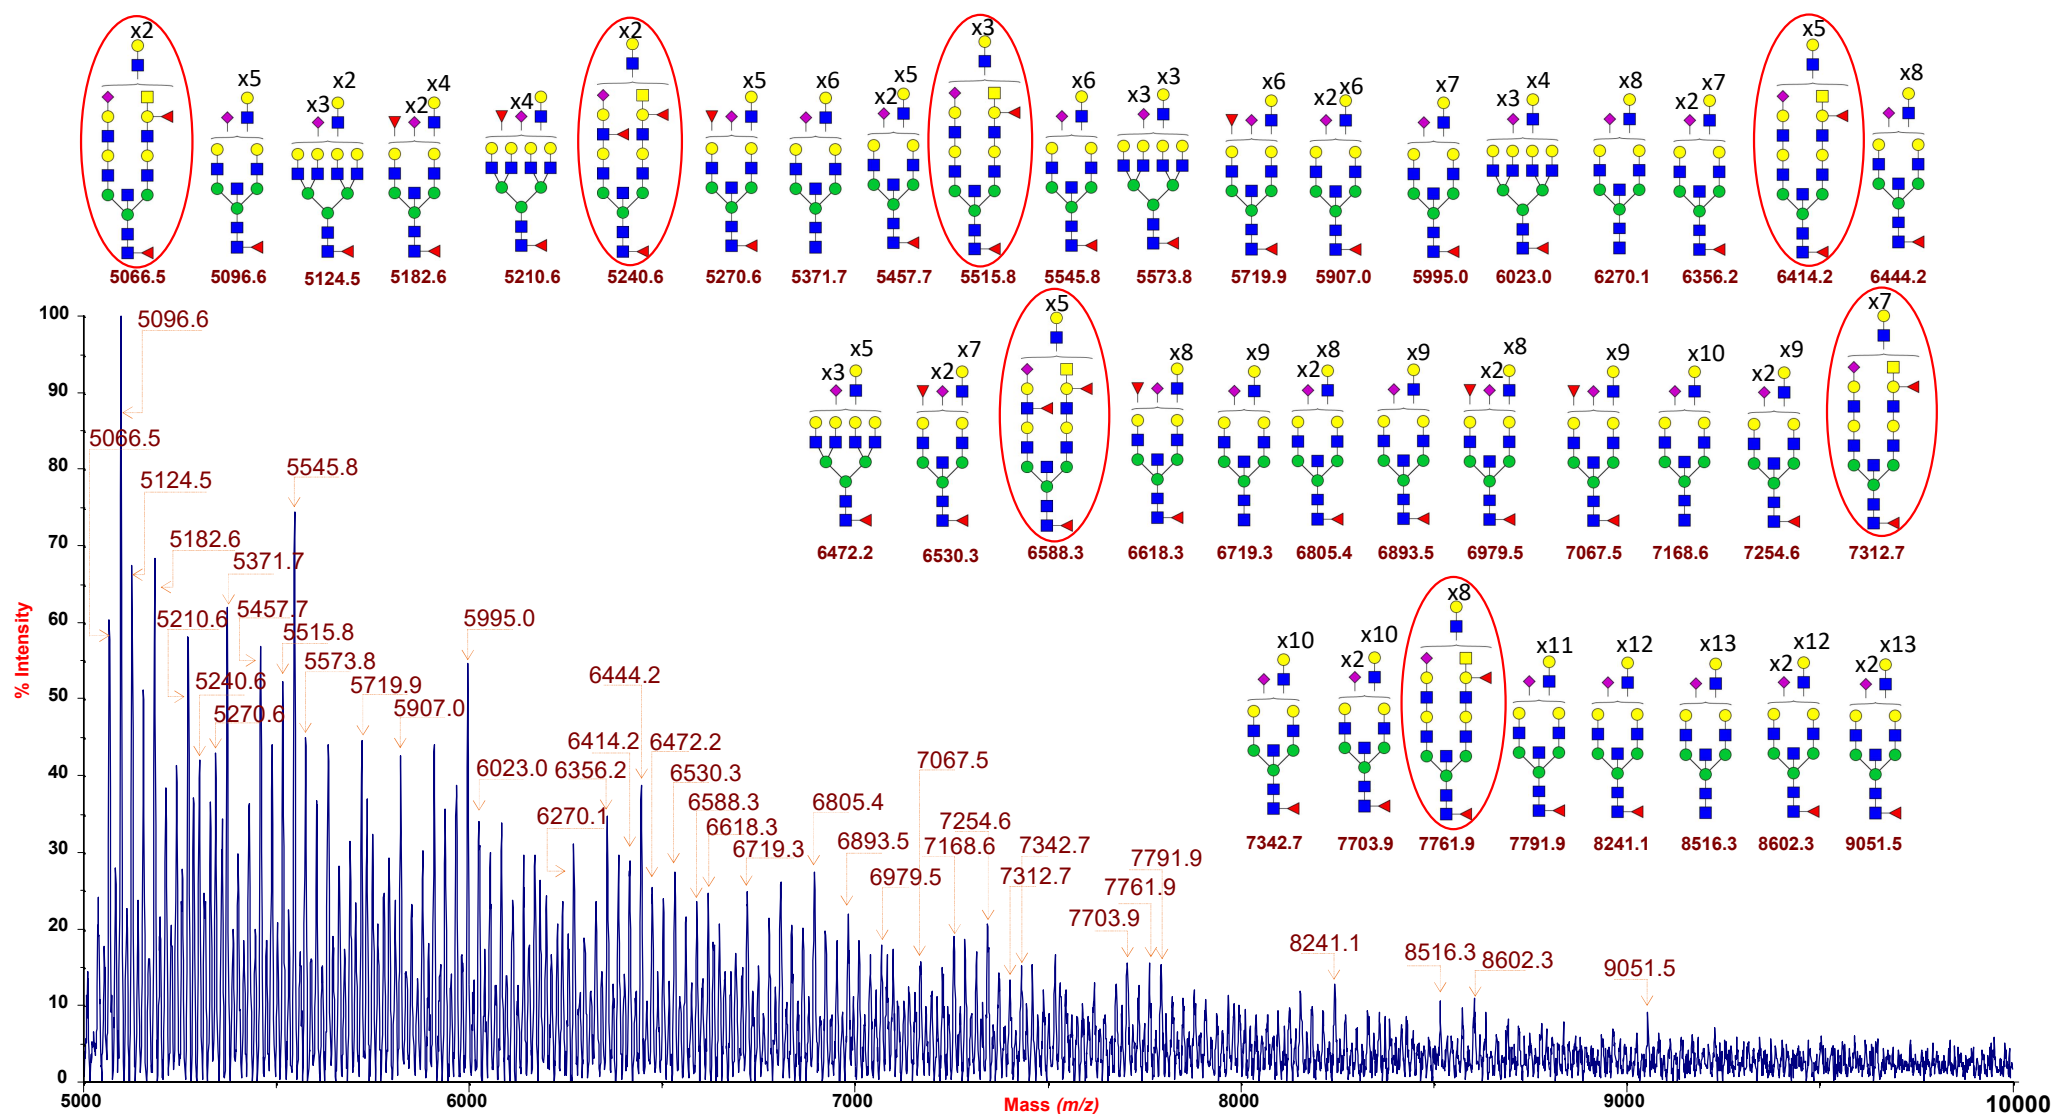

**Supplementary Figure 3. MALDI-TOF MS profile (high mass-range:  $m/z$  5000-10000) of permethylated human erythrocyte N-glycans from blood group A**

The present spectrum shows significant assignments, with those structures comprising the blood group A epitope highlighted with red circles.

GlcNAc: blue square; Man, green circle; Gal, yellow circle; NeuAc, purple lozenge; Fuc, red triangle.



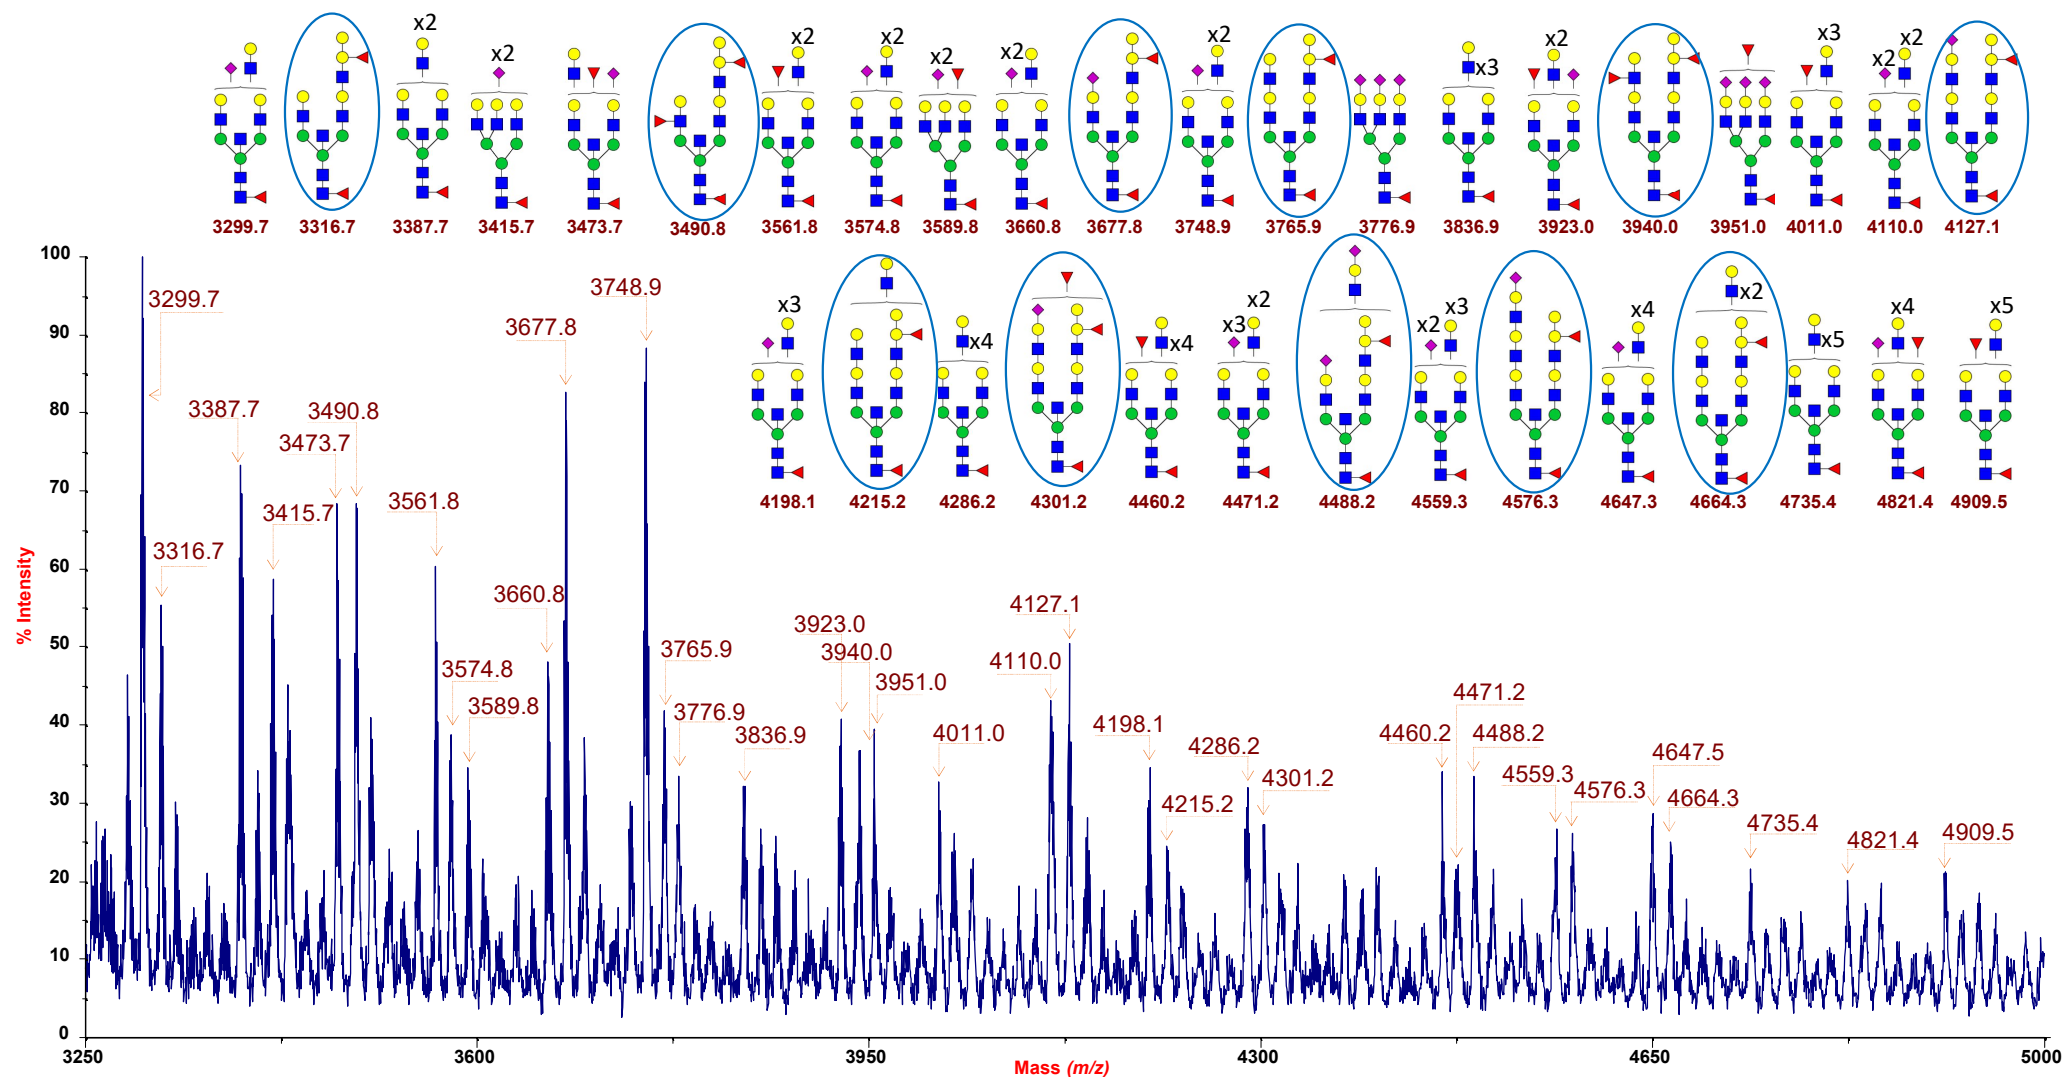

**Supplementary Figure 5. MALDI-TOF MS profile (middle mass-range:  $m/z$  3250-5000) of permethylated human erythrocyte N-glycans from blood group B**  
 The present spectrum shows significant assignments, with those structures comprising the blood group B epitope highlighted with blue circles.  
 GlcNAc: blue square; Man, green circle; Gal, yellow circle; NeuAc, purple lozenge; Fuc, red triangle.



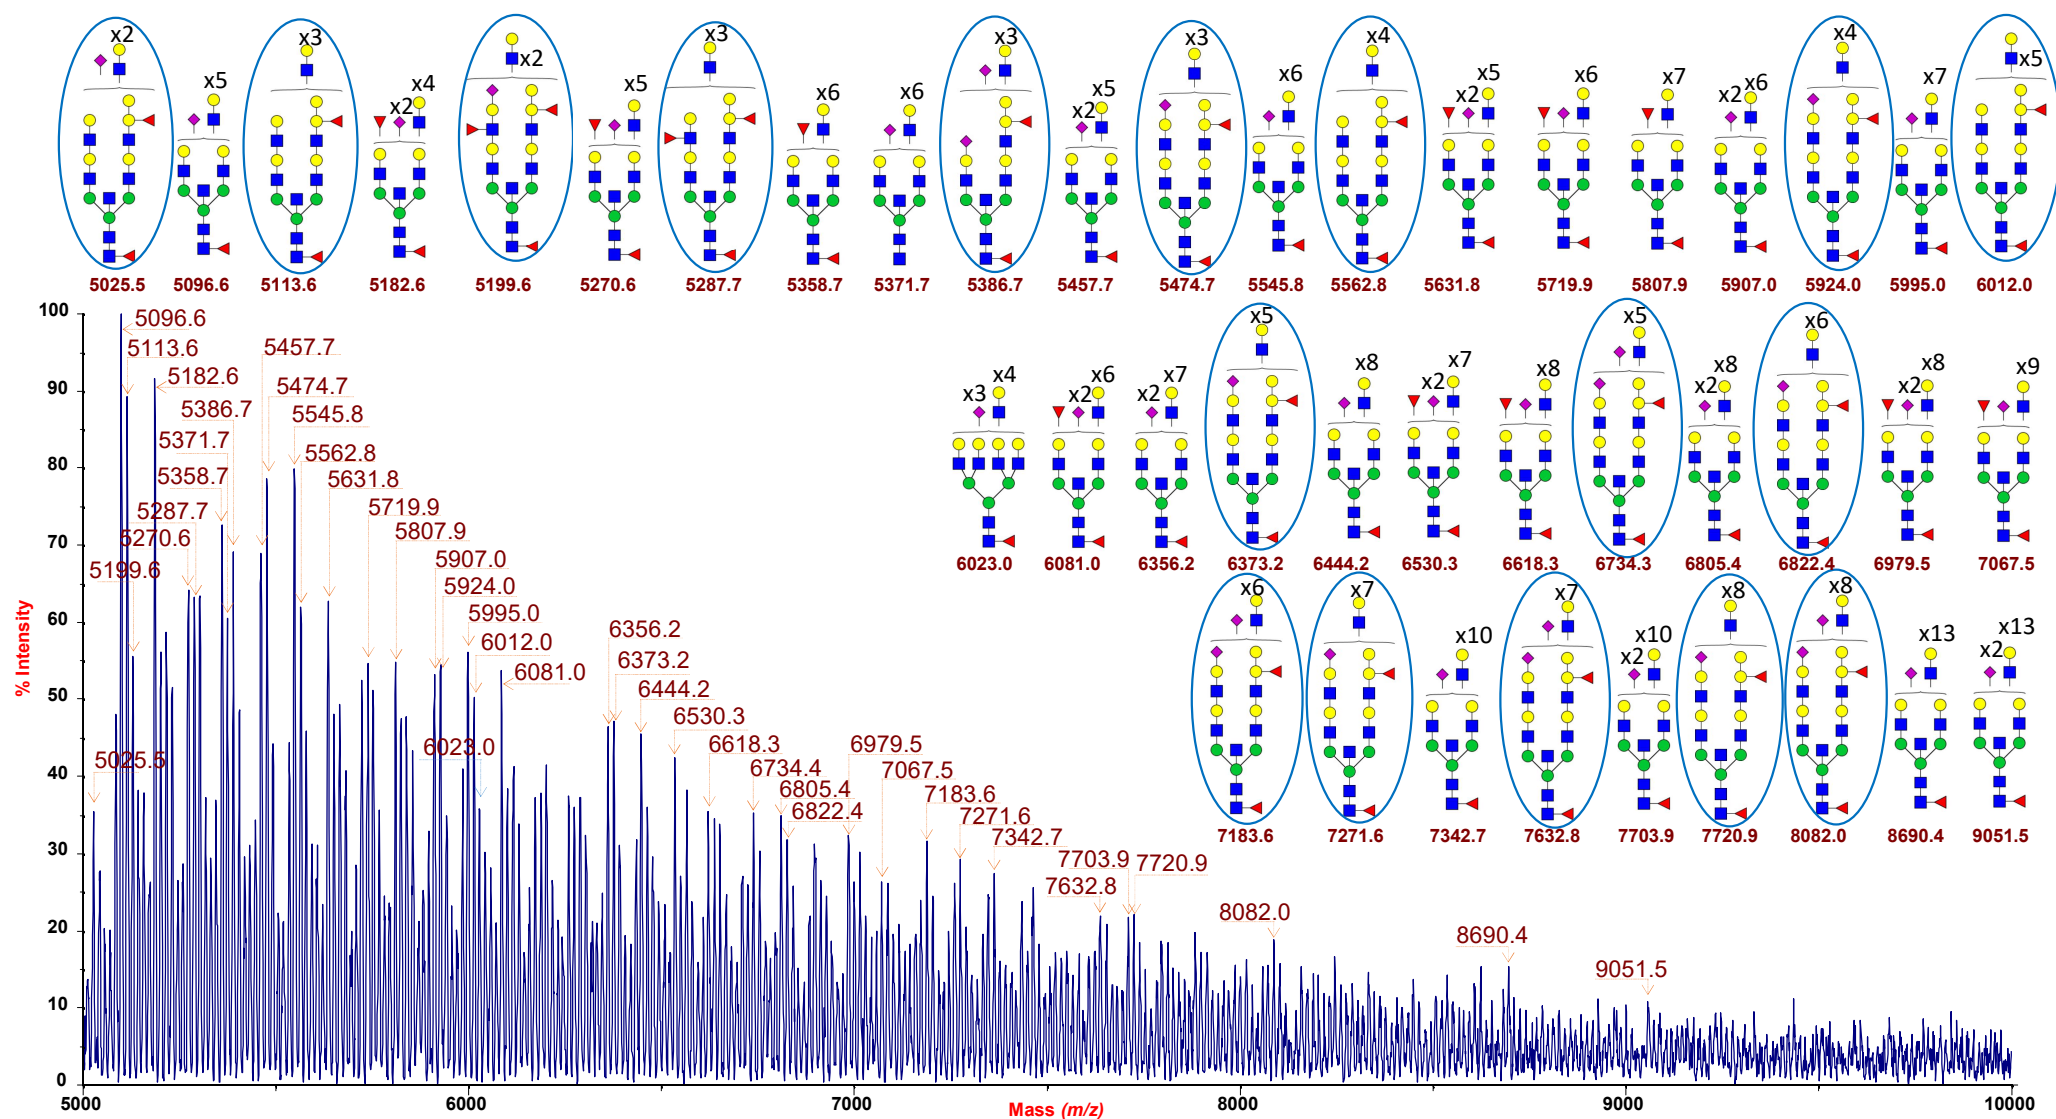

**Supplementary Figure 6. MALDI-TOF MS profile (high mass-range:  $m/z$  5000-10000) of permethylated human erythrocyte N-glycans from blood group B**  
 The present spectrum shows significant assignments, with those structures comprising the blood group B epitope highlighted with blue circles.  
 GlcNAc: blue square; Man, green circle; Gal, yellow circle; NeuAc, purple lozenge; Fuc, red triangle.

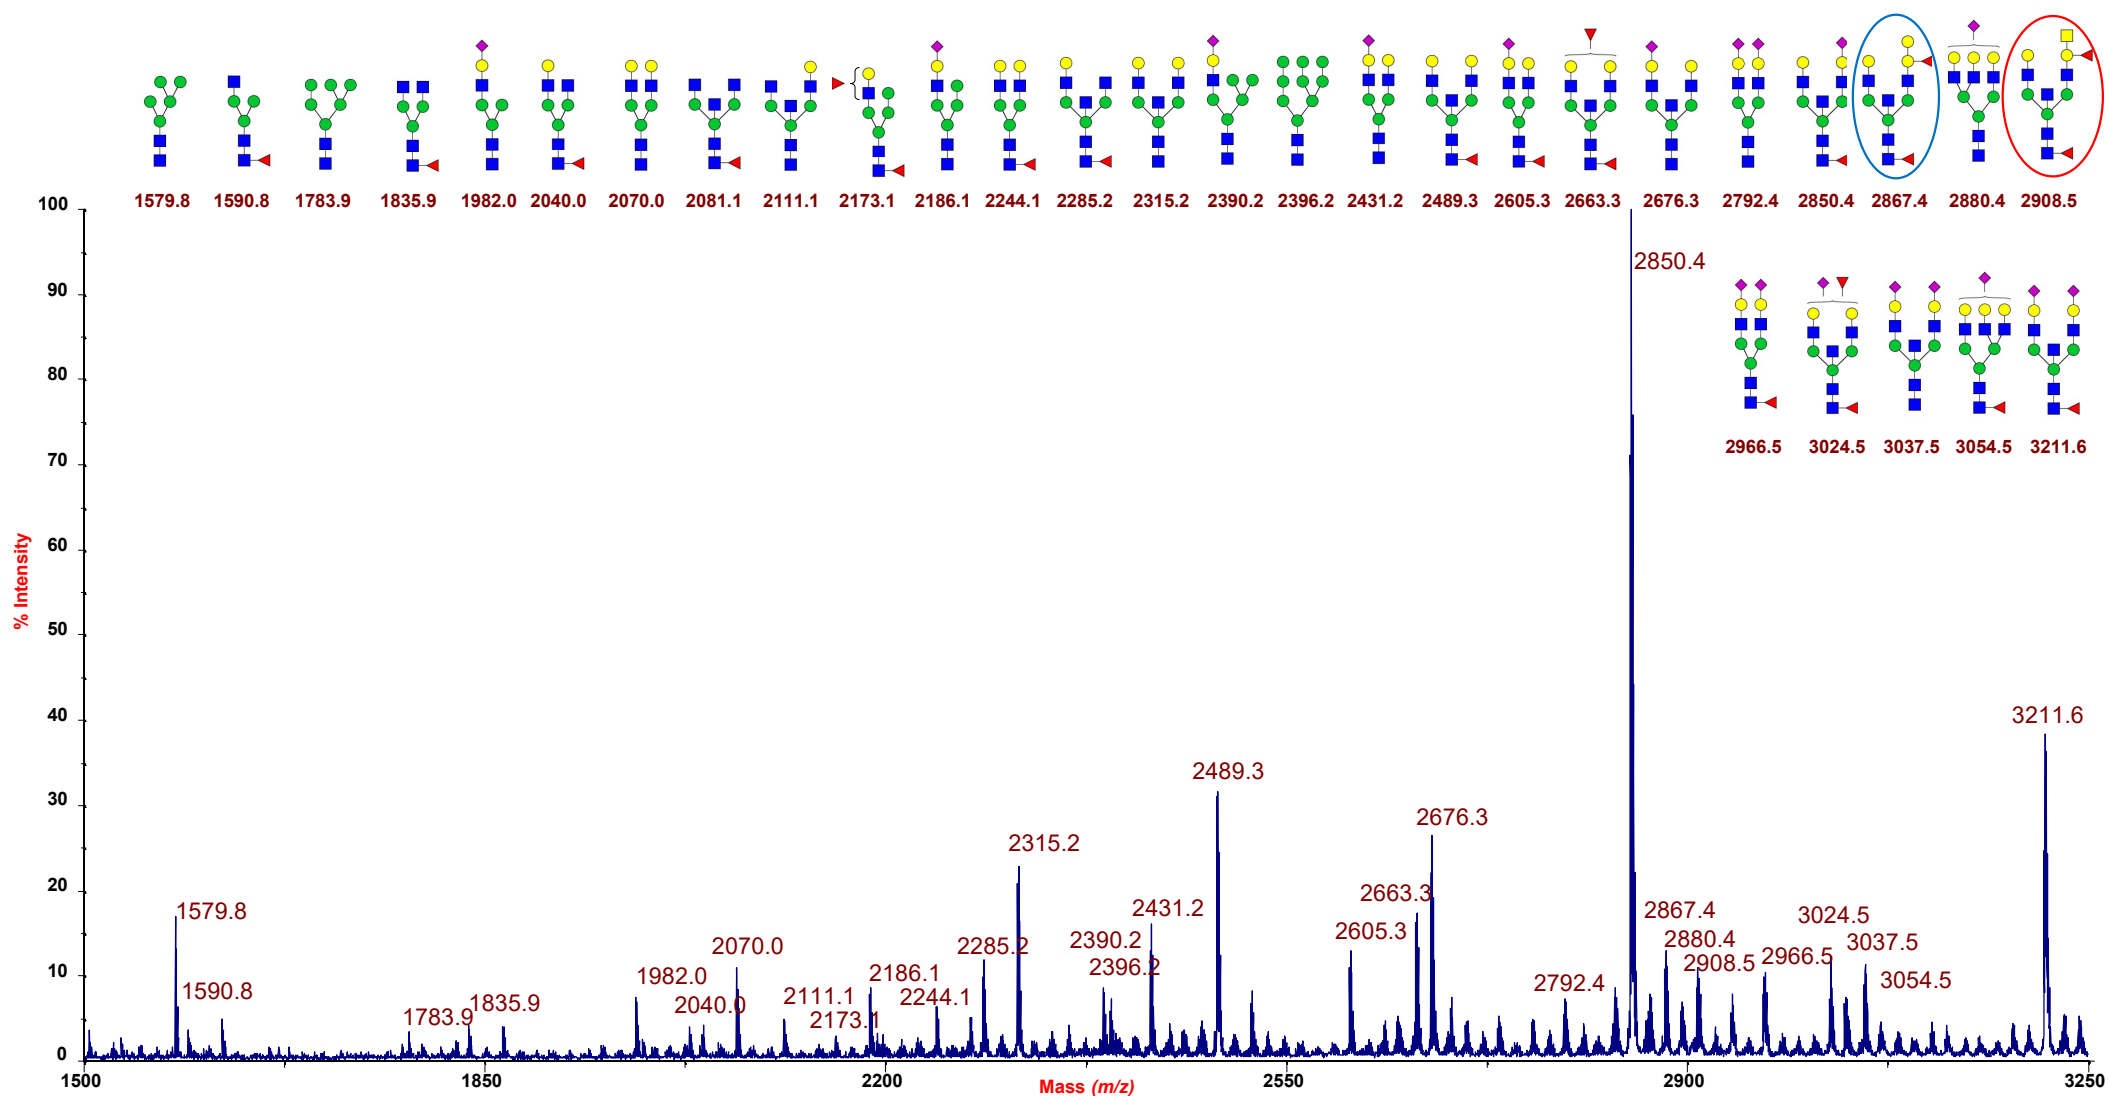

**Supplementary Figure 7. MALDI-TOF MS profile (low mass-range:  $m/z$  1500-3250) of permethylated human erythrocyte N-glycans from blood group AB**  
 The present spectrum shows significant assignments, with those structures comprising blood group A or B epitopes highlighted with red or blue circles, respectively. GlcNAc: blue square; Man, green circle; Gal, yellow circle; NeuAc, purple lozenge; Fuc, red triangle.

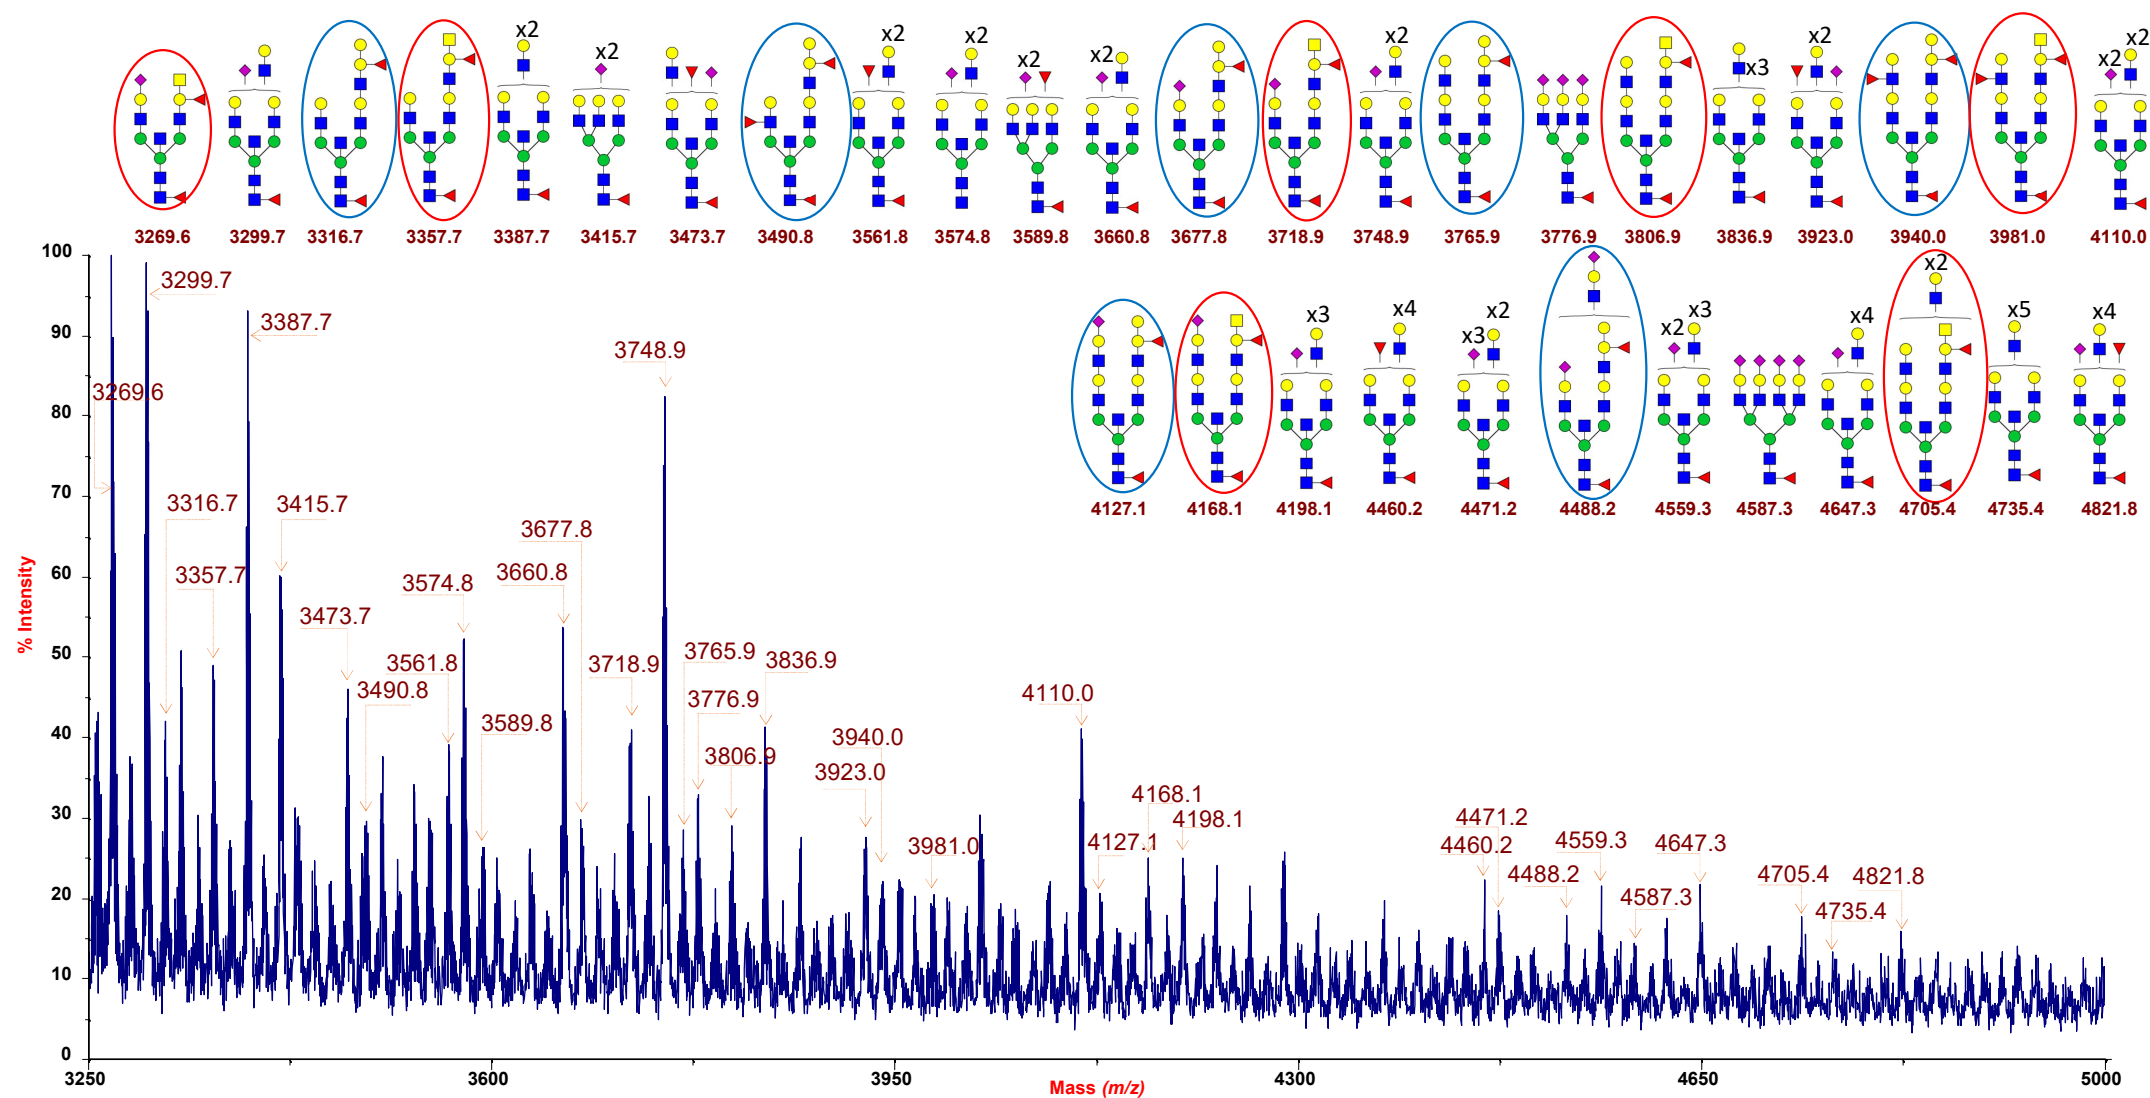

**Supplementary Figure 8. MALDI-TOF MS profile (middle mass-range:  $m/z$  3250-5000) of permethylated human erythrocyte N-glycans from blood group AB**  
 The present spectrum shows significant assignments, with those structures comprising blood group A or B epitopes highlighted with red or blue circles, respectively.  
 GlcNAc: blue square; Man, green circle; Gal, yellow circle; NeuAc, purple lozenge; Fuc, red triangle.



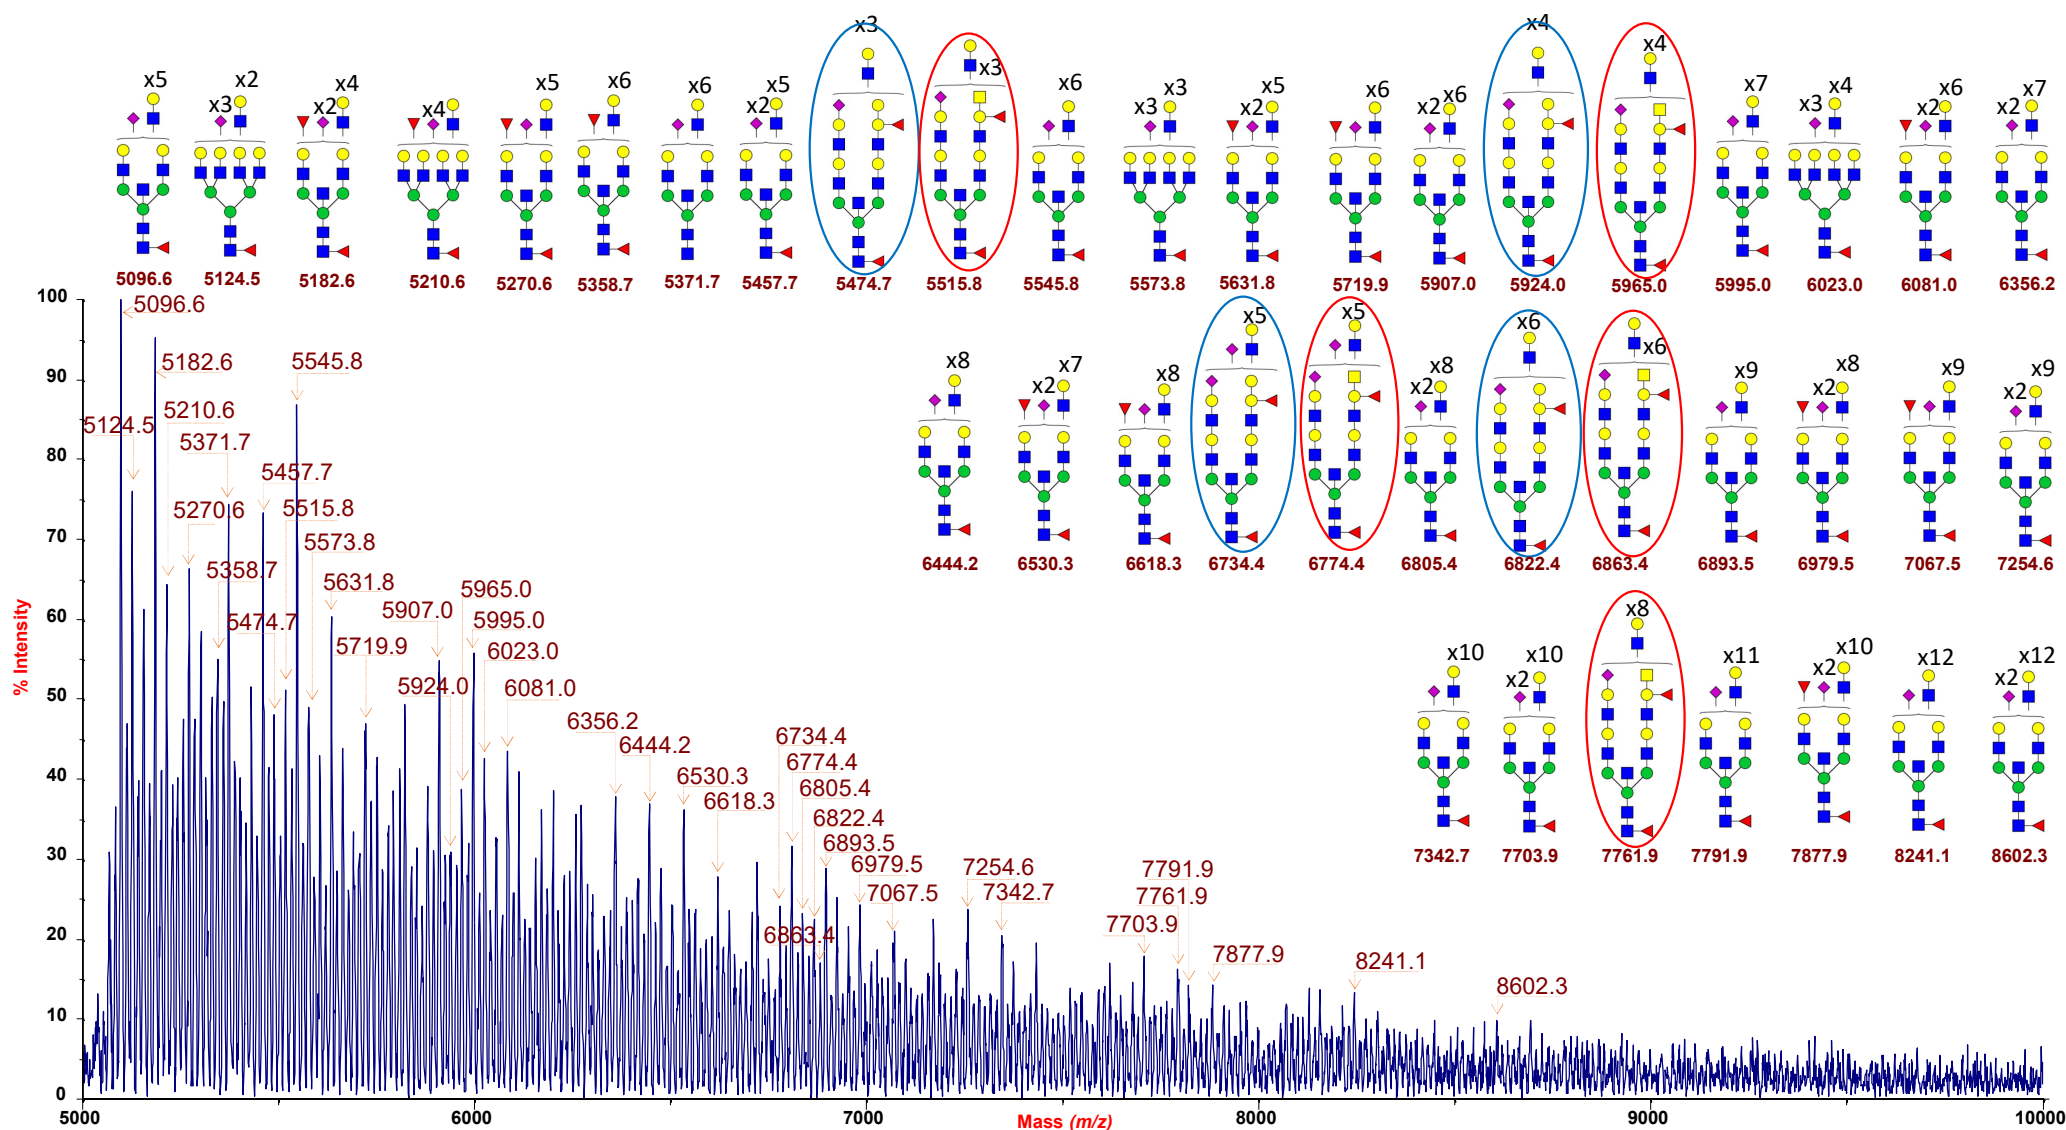

**Supplementary Figure 9. MALDI-TOF MS profile (high mass-range:  $m/z$  5000-10000) of permethylated human erythrocyte N-glycans from blood group AB**  
The present spectrum shows significant assignments, with those structures comprising blood group A or B epitopes highlighted with red or blue circles, respectively. GlcNAc: blue square; Man, green circle; Gal, yellow circle; NeuAc, purple lozenge; Fuc, red triangle.

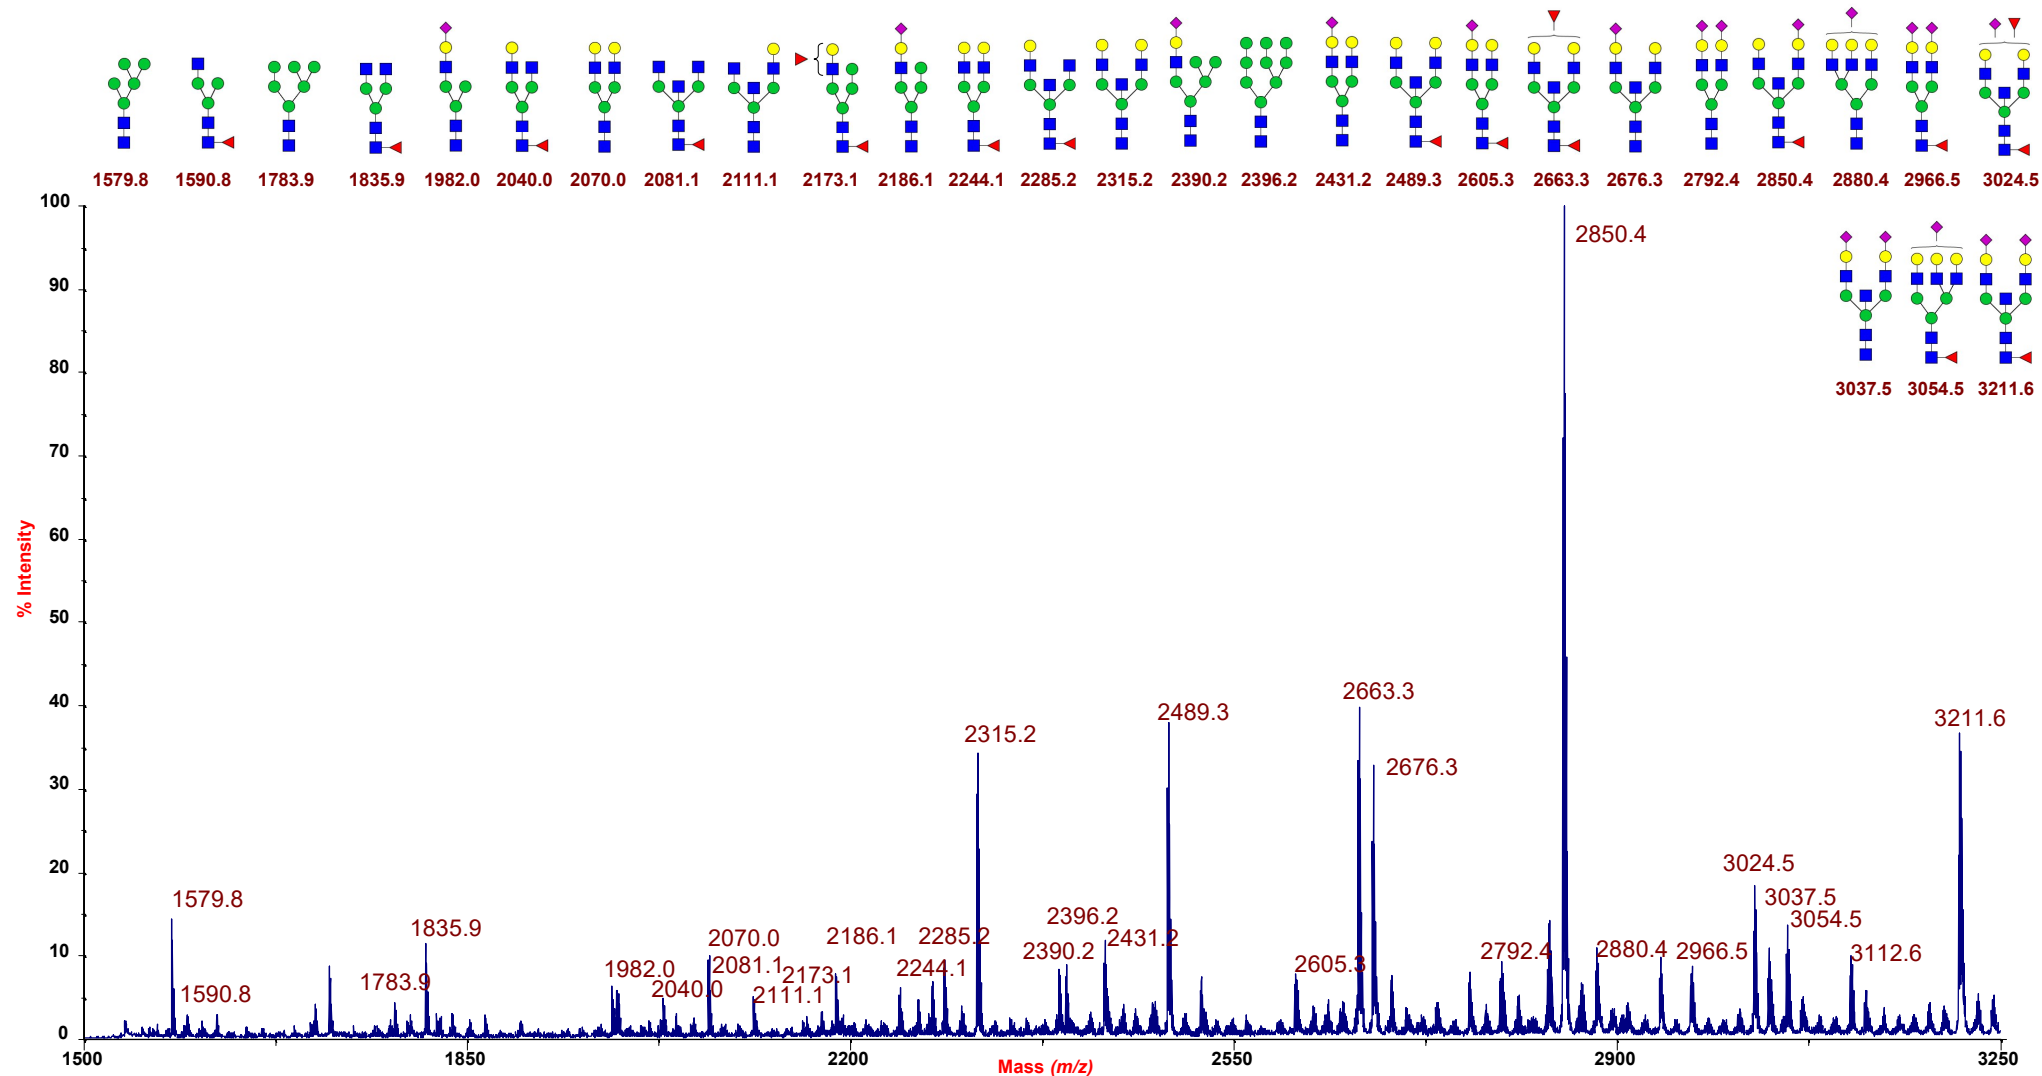

**Supplementary Figure 10. MALDI-TOF MS profile (low mass-range:  $m/z$  1500-3250) of permethylated human erythrocyte N-glycans from blood group O**  
 The present spectrum shows significant assignments characterized by the absence of distinctive H antigen-bearing structures.  
 GlcNAc: blue square; Man, green circle; Gal, yellow circle; NeuAc, purple lozenge; Fuc, red triangle.

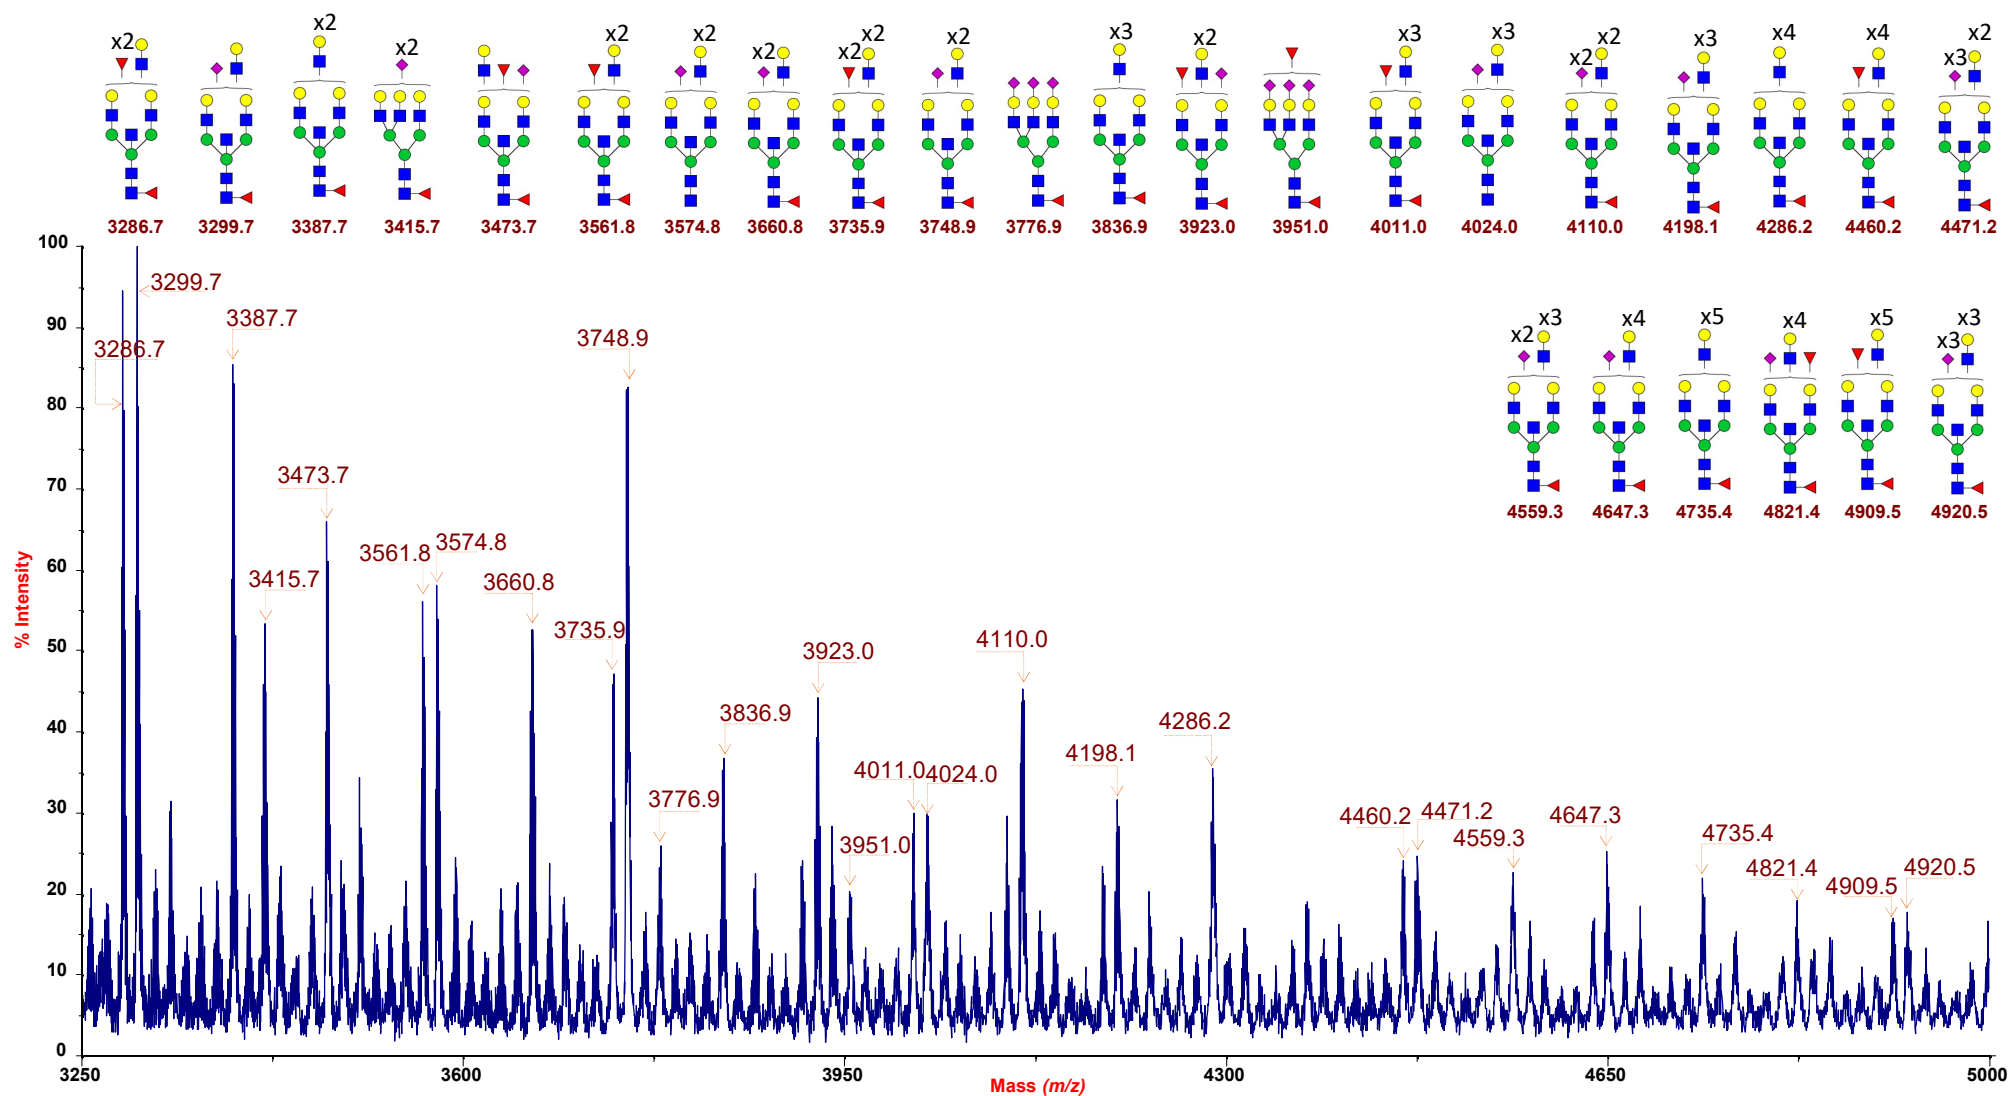

**Supplementary Figure 11. MALDI-TOF MS profile (middle mass-range:  $m/z$  3250-5000) of permethylated human erythrocyte N-glycans from blood group O**  
The present spectrum shows significant assignments characterized by the absence of distinctive H antigen-bearing structures.  
GlcNAc: blue square; Man, green circle; Gal, yellow circle; NeuAc, purple lozenge; Fuc, red triangle.

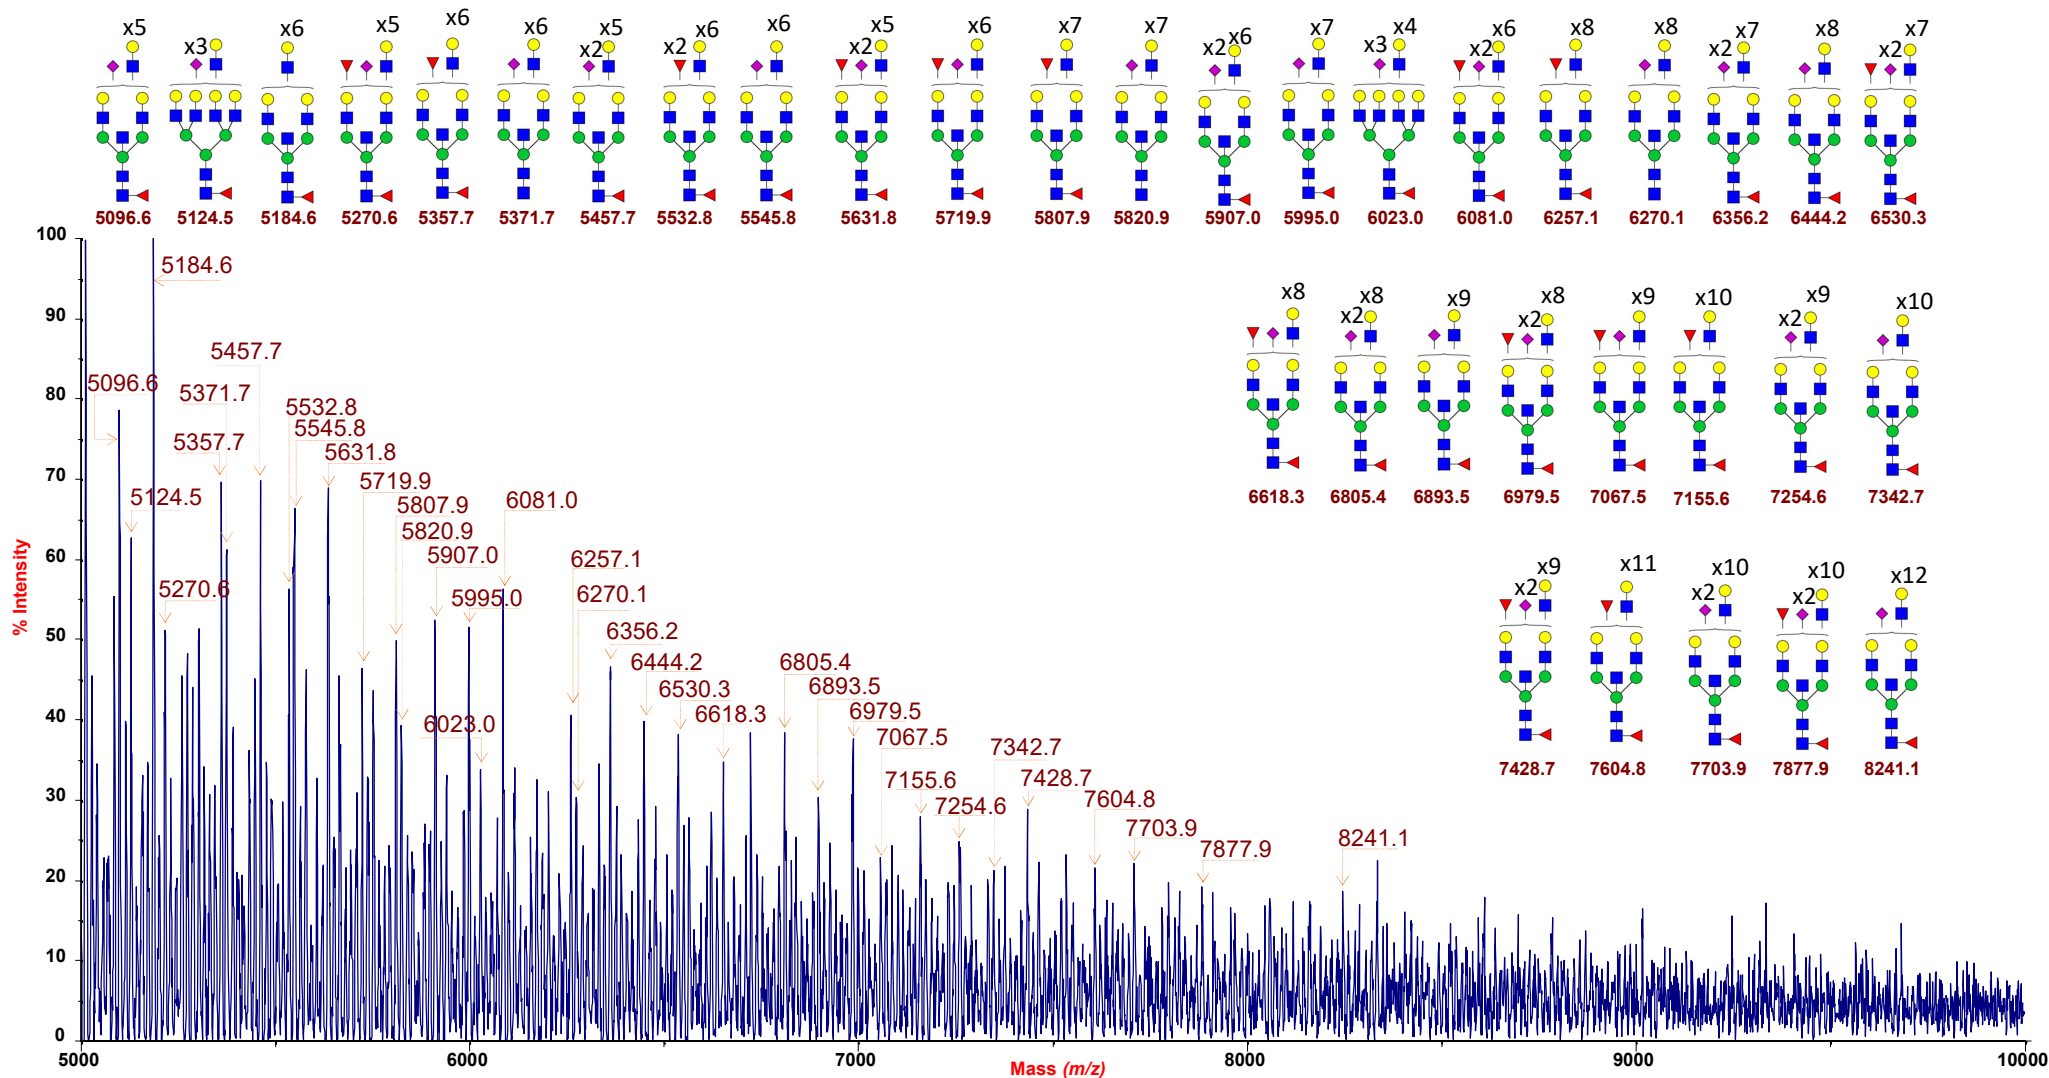

**Supplementary Figure 12. MALDI-TOF MS profile (high mass-range:  $m/z$  5000-10000) of permethylated human erythrocyte N-glycans from blood group O**  
 The present spectrum shows significant assignments characterized by the absence of distinctive H antigen-bearing structures.  
 GlcNAc: blue square; Man, green circle; Gal, yellow circle; NeuAc, purple lozenge; Fuc, red triangle.
